# Supplementary material for: Dynamic Morphological Staging of Drosophila Pupal Development
Source: Research Square preprint supplement (doi:10.21203/rs.3.rs-6337002/v1), 2025-05-07
Supplement: Supplementary file 1 [file 3d316331e858737f43902f01.pdf]

1 **Supplemental Material**

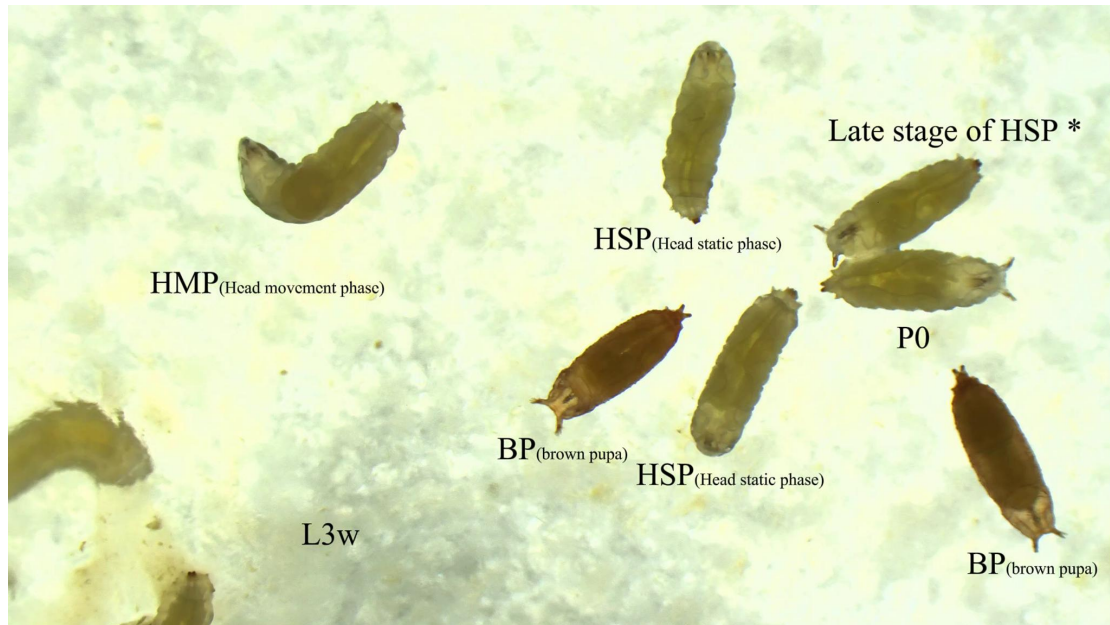

2

3 **Video S1. Different morphology of HMP, HSP, white pupa stage and brown pupa**  
4 **stage**

5 The video simultaneously presents the morphological characteristics of fruit flies  
6 at five different developmental stages. The one marked with an asterisk (\*) is  
7 currently in the transition period from HSP to P0. When exposed to external  
8 environmental stimuli, it exhibits head peristaltic movements.

9

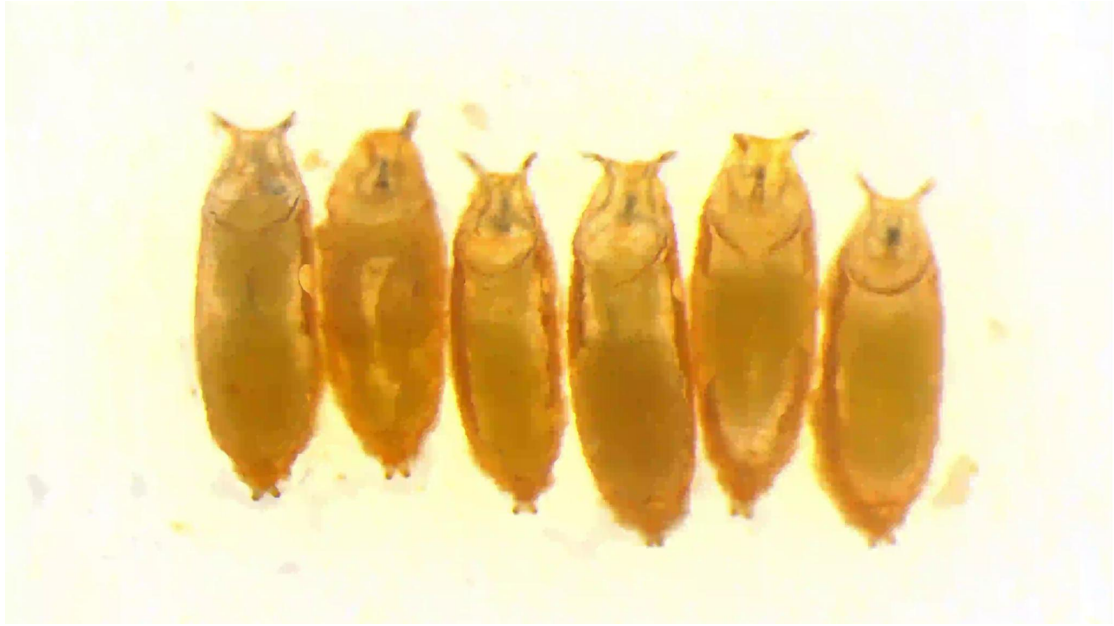

10

11 **Video S2. Outer pupal bubble formation and displacement**

12

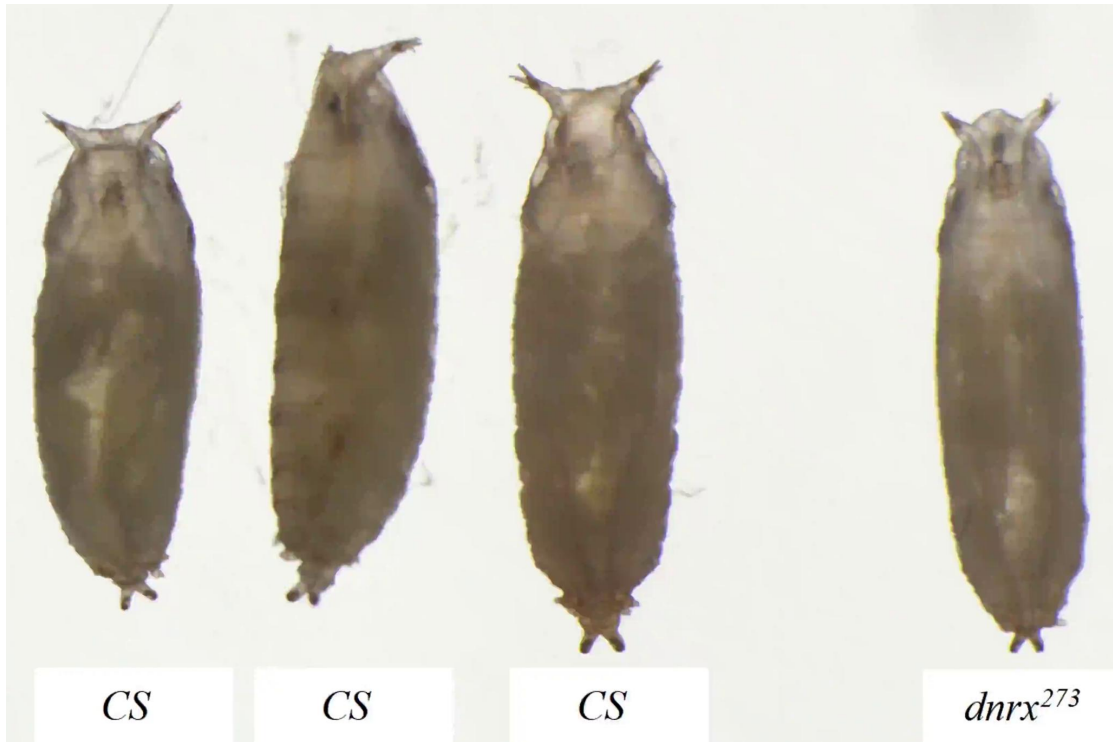

13

14 **Video S3. Differences between *dnrx*<sup>273</sup> and *CS* during pupal development**

15

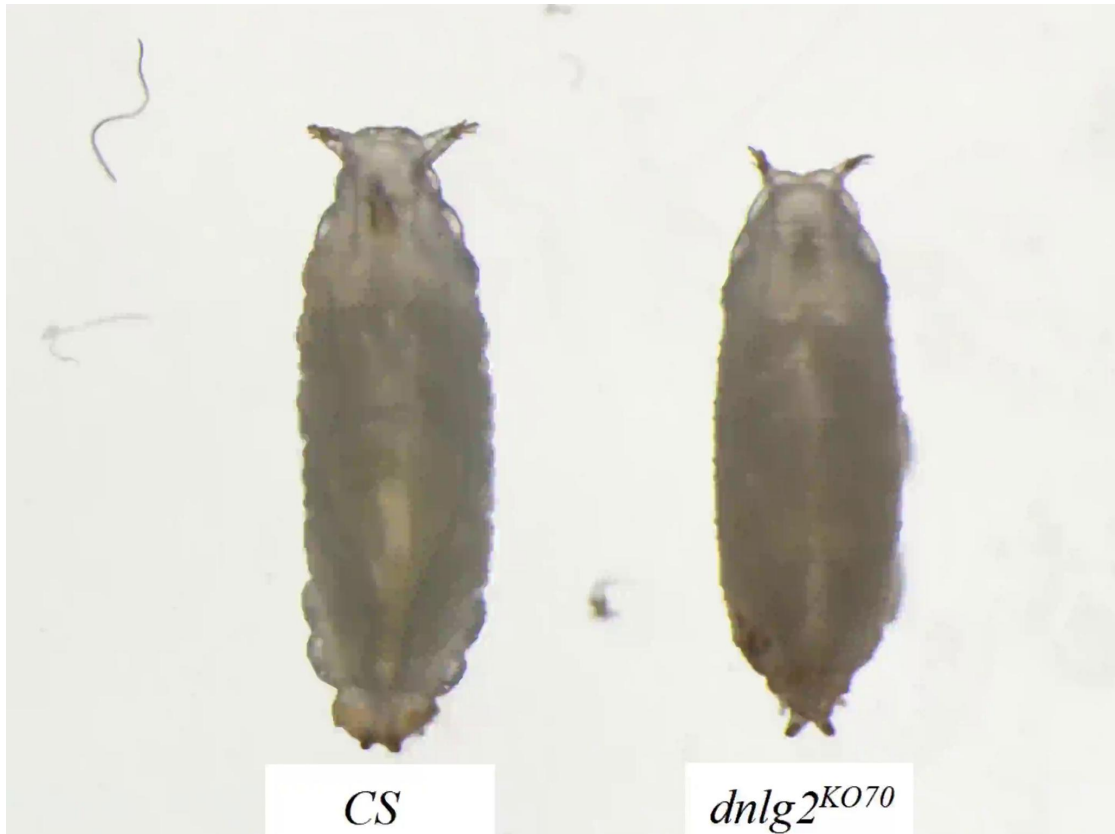

**Video S4. Differences between *dnlg2*<sup>KO70</sup> and *CS* during pupal development**

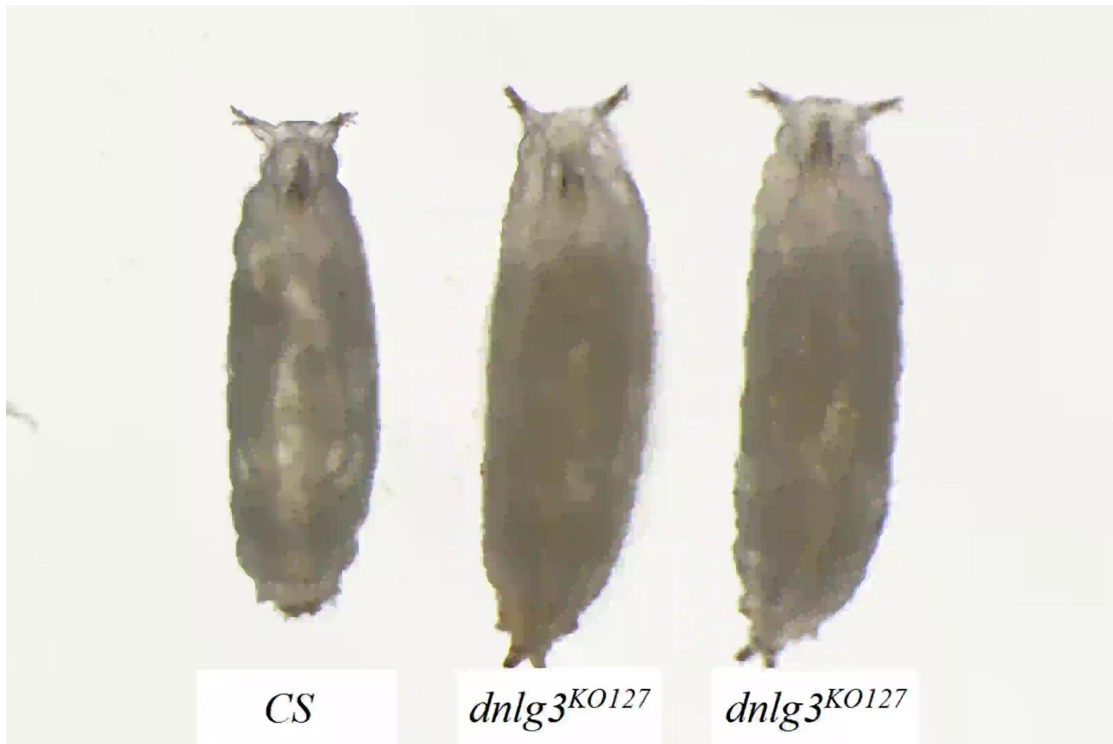

19

20 **Video S5. Differences between *dnl3*<sup>KO127</sup> and CS during pupal development**

21

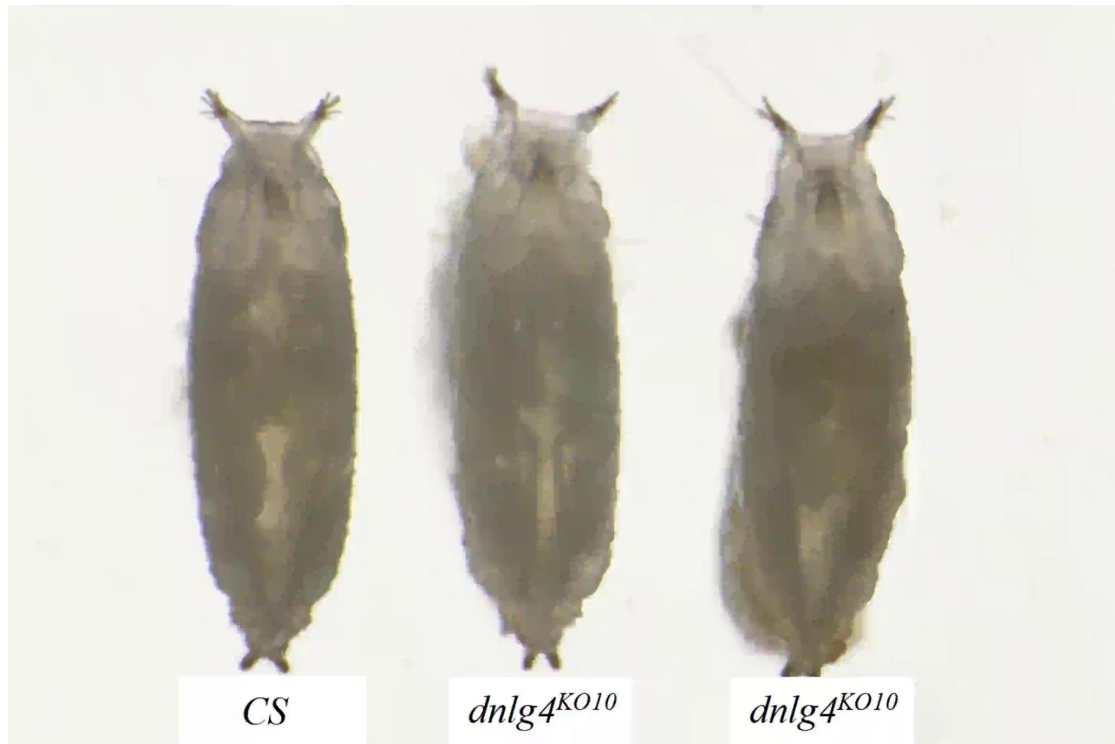

22

23 **Video S6. Differences between *dnlg4*<sup>KO10</sup> and *CS* during pupal development**

24

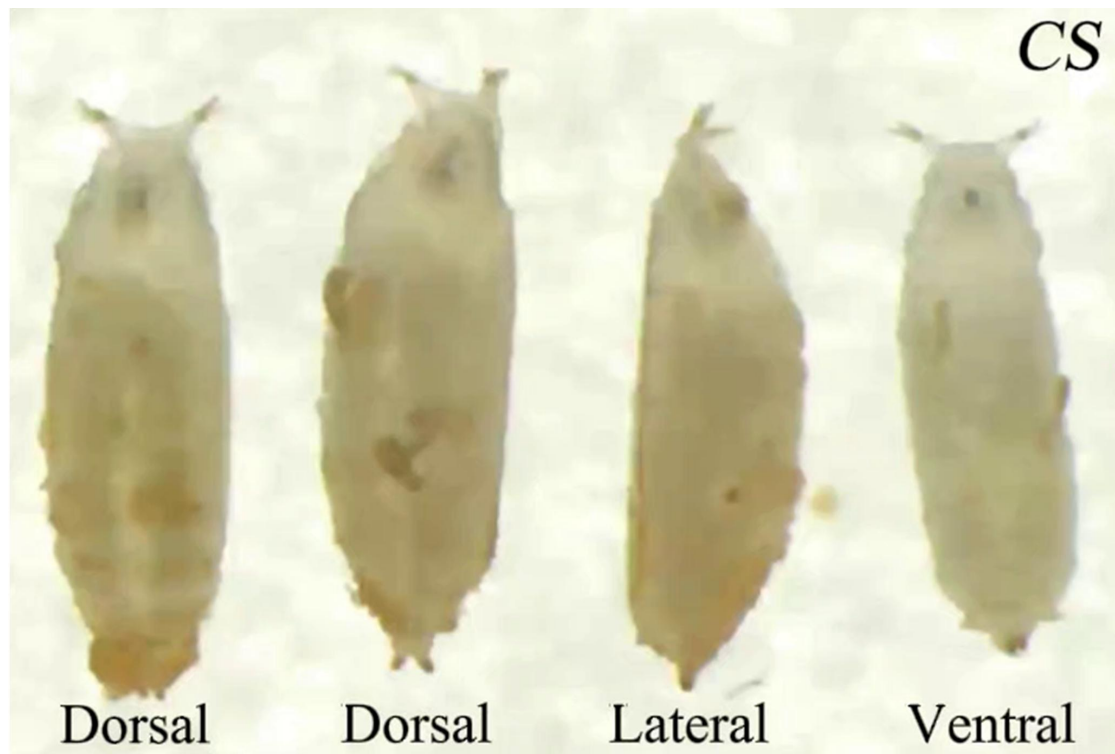

25

26

**Video S7. Complete developmental process of *CS* pupae**

27



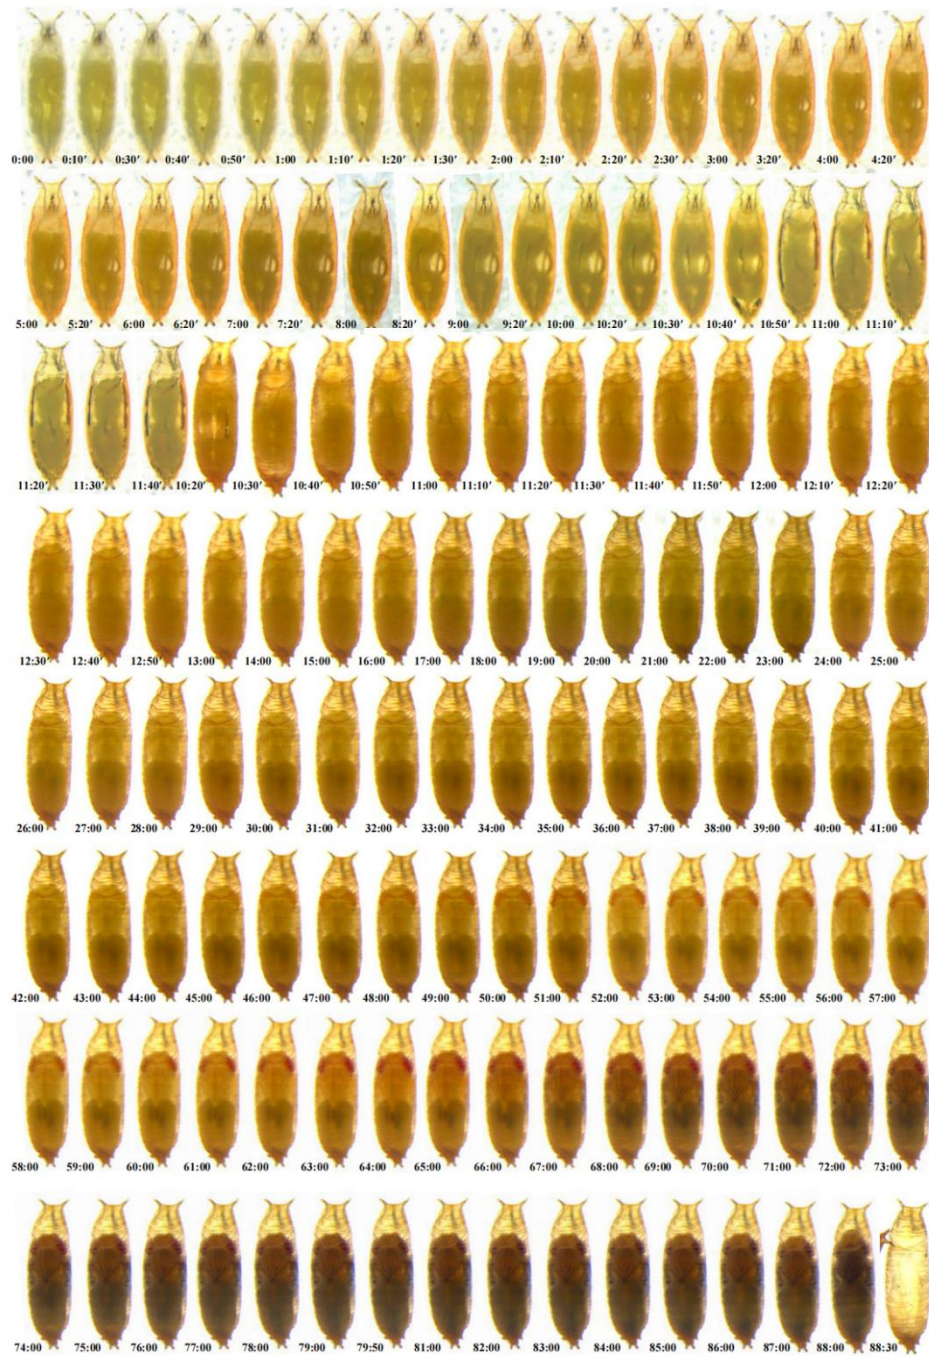

28

29 **Figure S1. Complete developmental process of the shape in the dorsal view of the**

30 **pupal stage of *Drosophila***

31



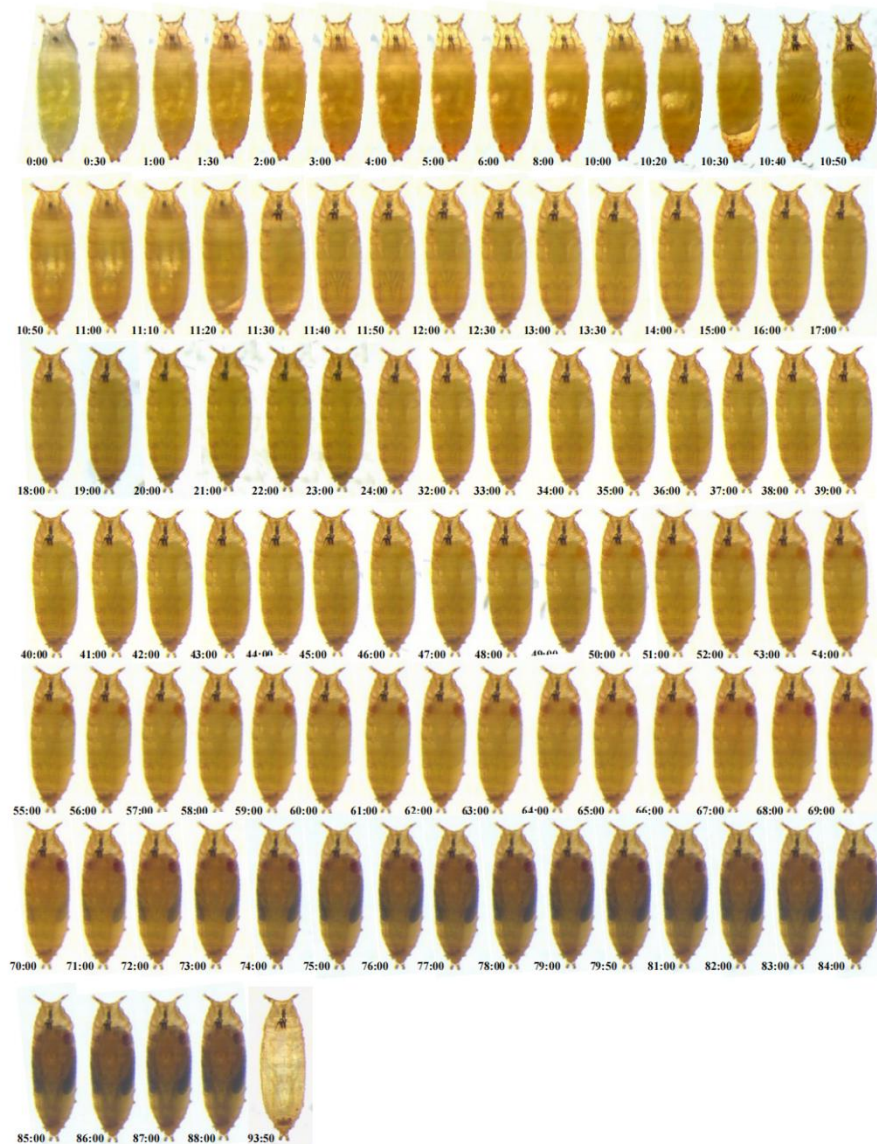

32

33 **Figure S2. Complete developmental process of the shape in the ventral view of**

34 **the pupal stage of *Drosophila***

35

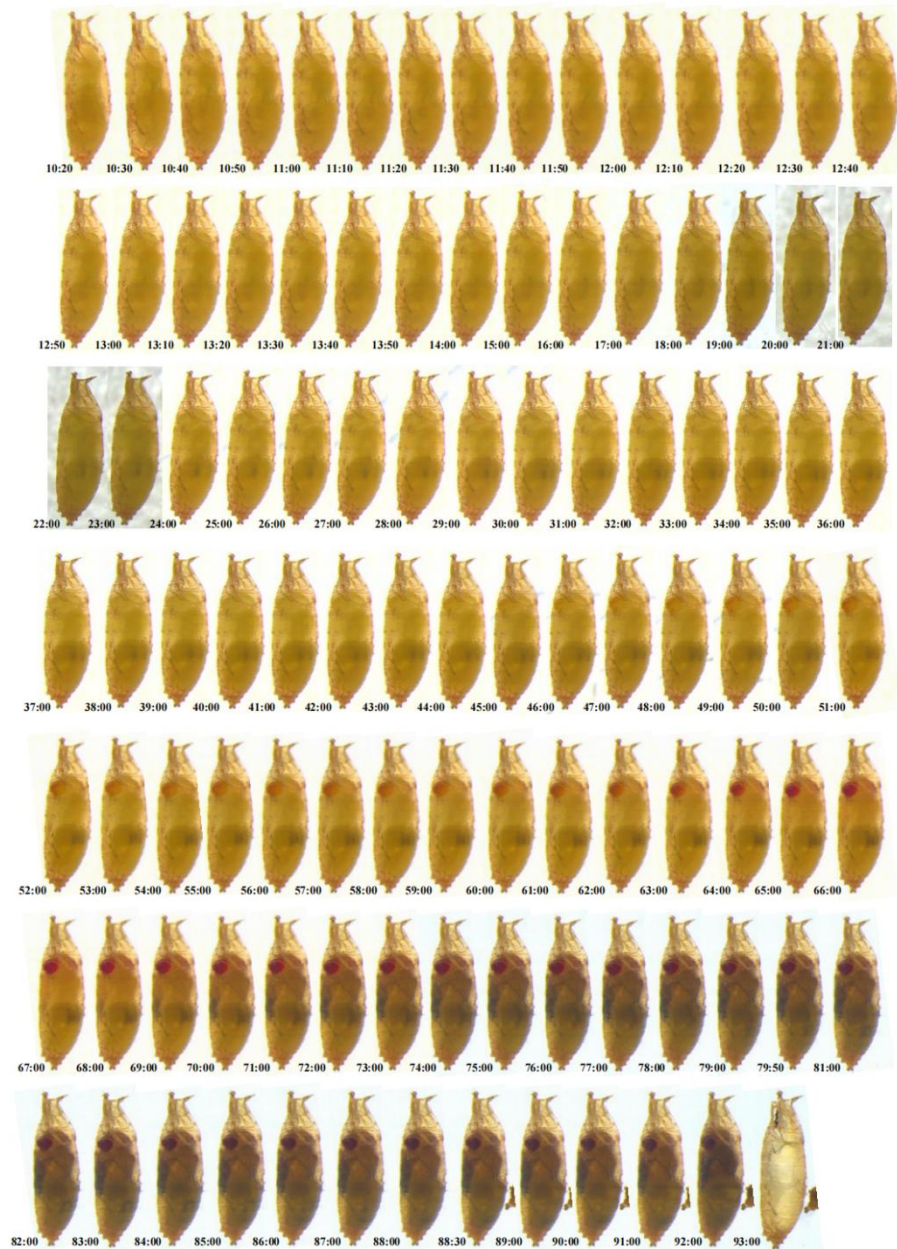

36

37 **Figure S3. Complete developmental process of the shape in the lateral view of the**

38 **pupal stage of *Drosophila***

39



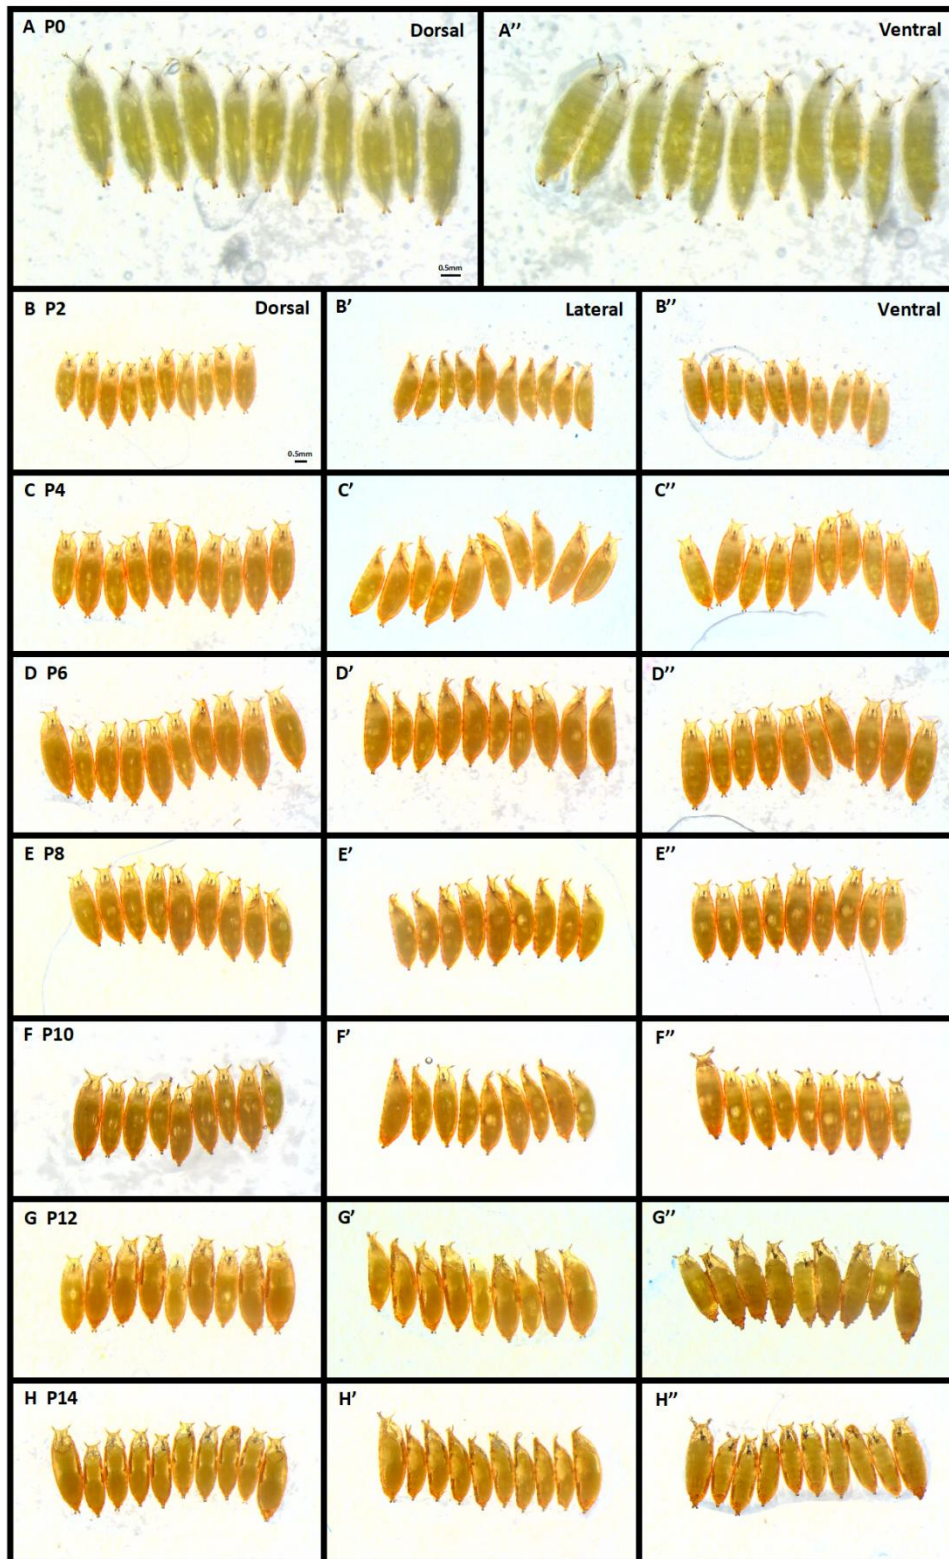

**Figure S4-1. Observation results of the gap sampling of the pupal stage (P0-P14)**

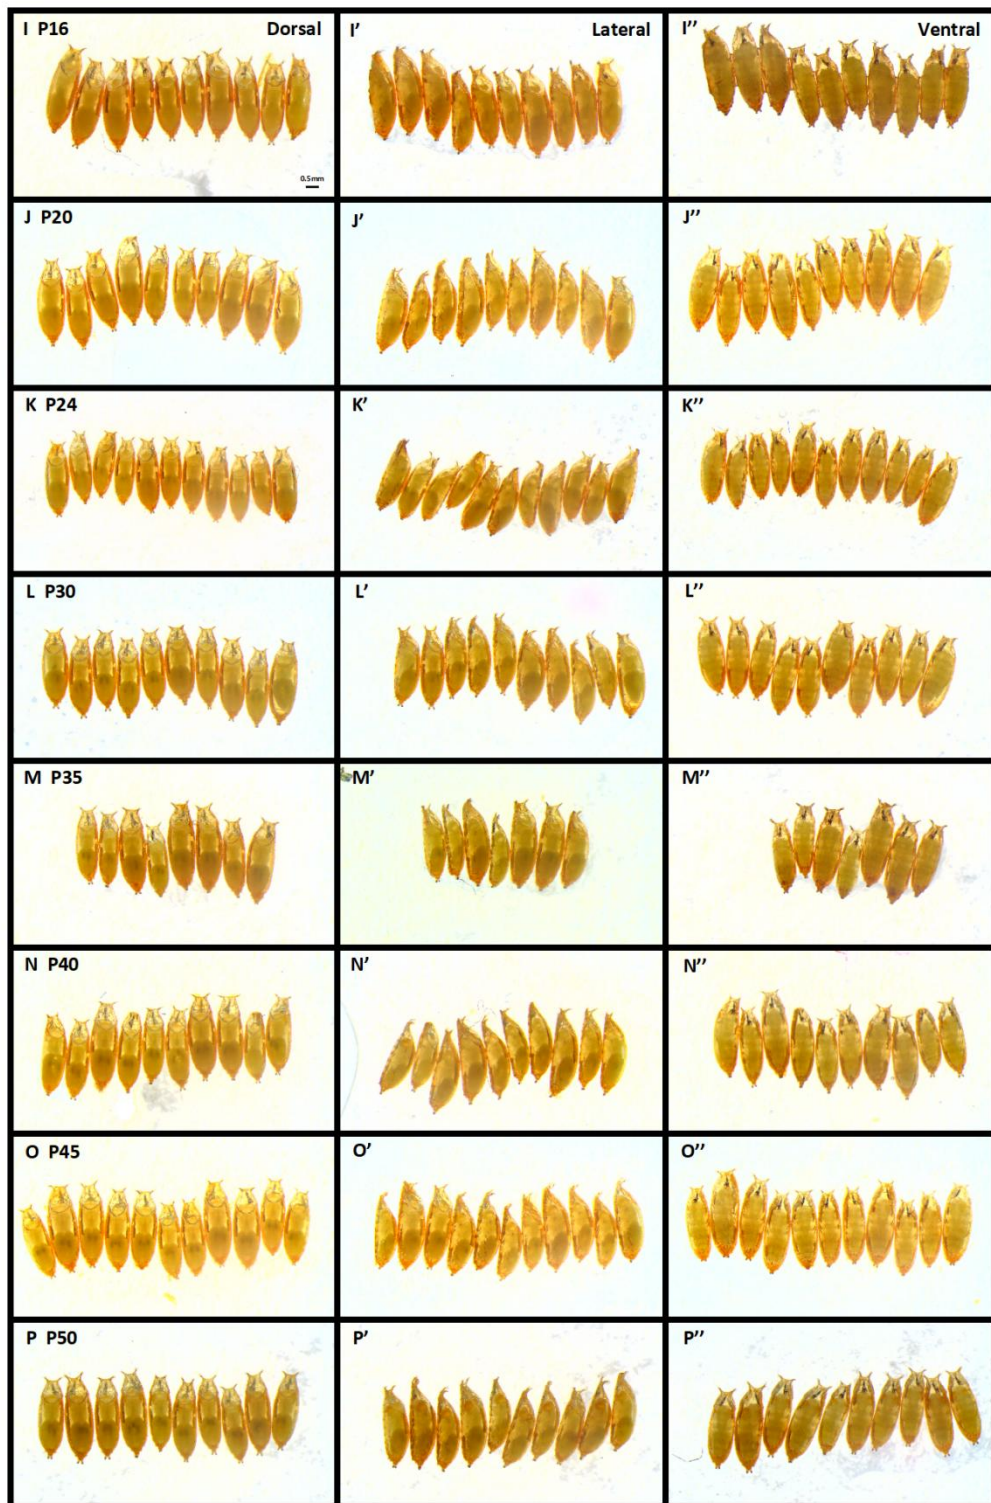

43

44 **Figure S4-2. Observation results of the gap sampling of the pupal stage**

45 **(P16-P50)**

46



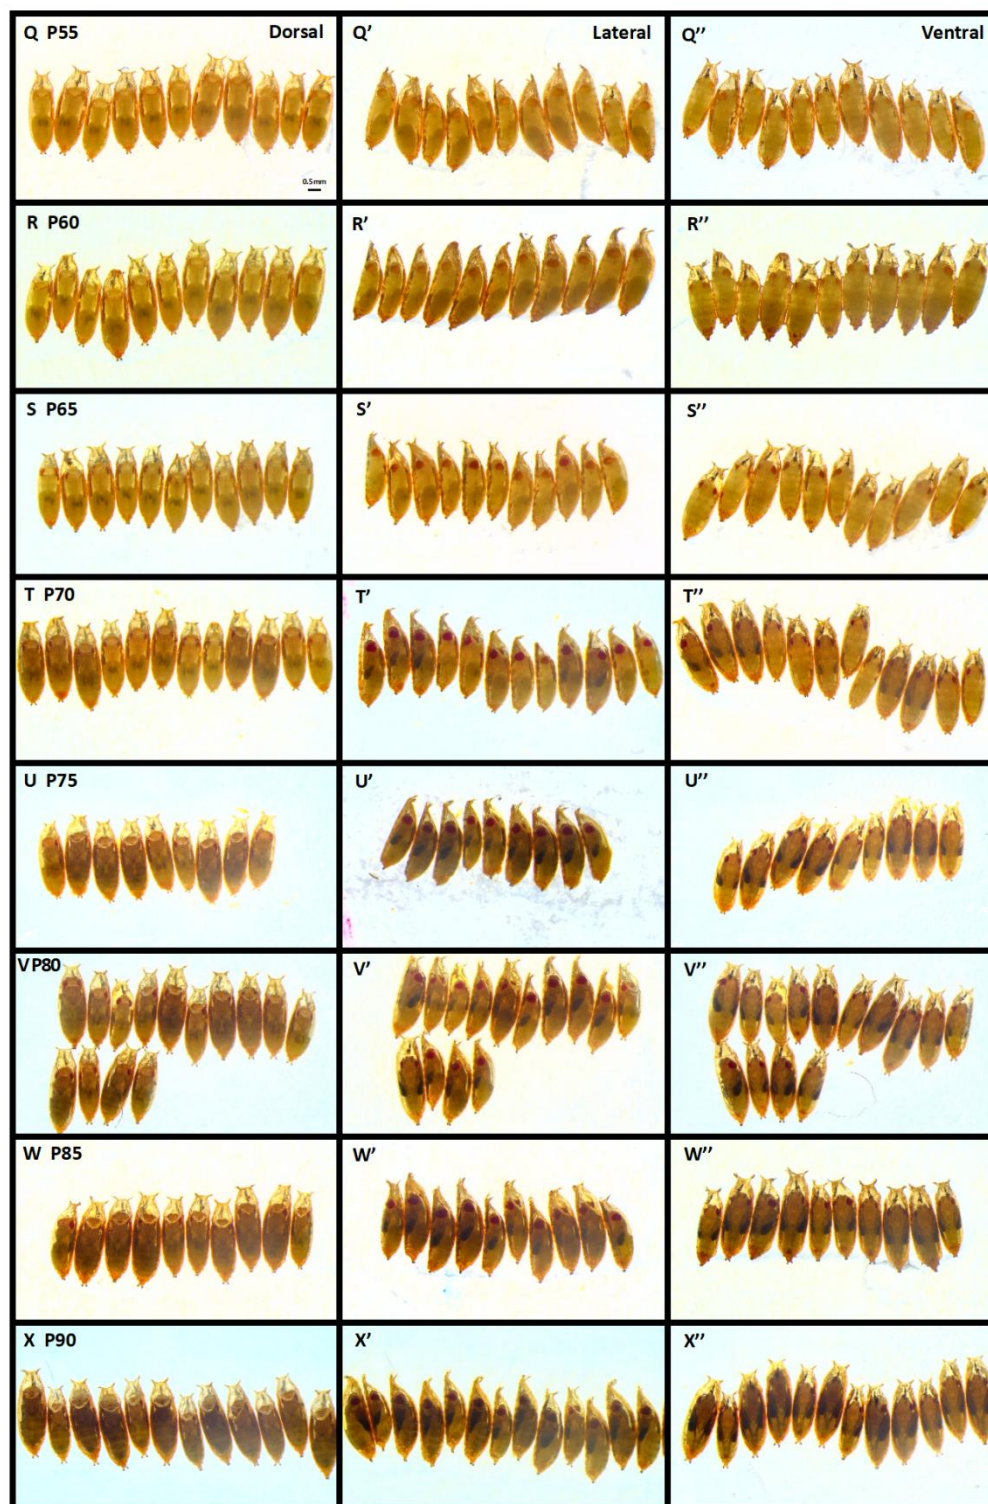

47

48 **Figure S4-3. Observation results of the gap sampling of the pupal stage**

49 **(P55-P90)**

50

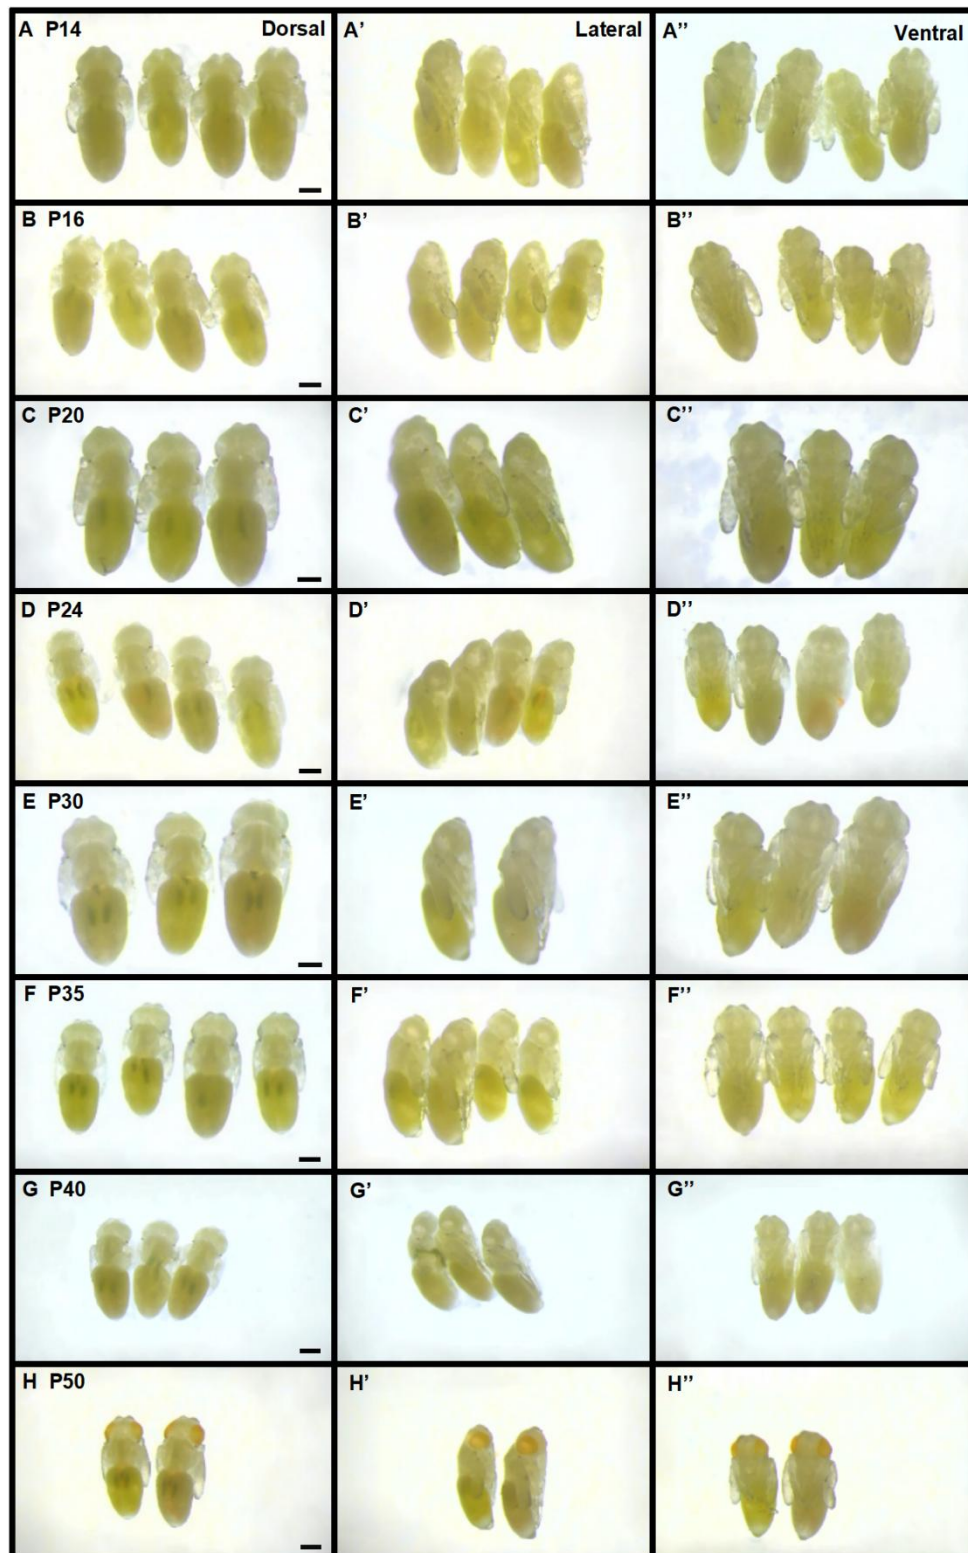

51

52 **Figure S5-1. Post-removal morphology of the pupal stage (puparium removed)**

53 **(P14-P50)**

54



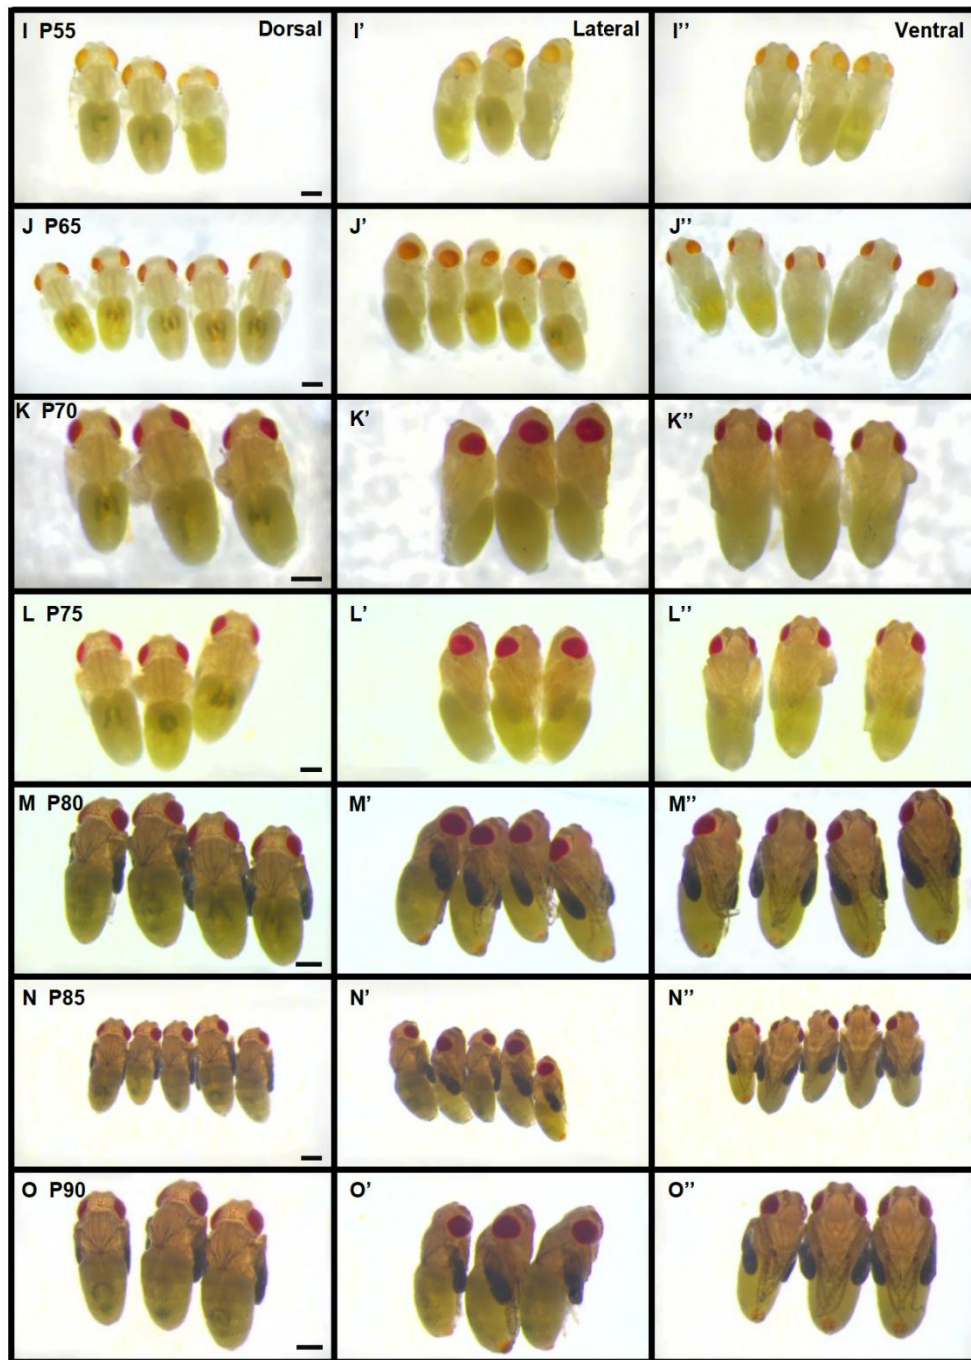

55

56 **Figure S5-2. Post-removal morphology of the pupal stage (puparium removed)**

57 **(P55-P90)**
